# Supplementary material for: Stabilization of the blue phases of simple rodlike monoester compounds by addition of their achiral homologues
Source: Royal Society of Chemistry journal article supplement (doi:10.1039/c2jm16359d), 2012-01-01
Supplement: c2jm16359d.pdf [file c2jm16359d.pdf]

## Stabilization of the blue phases of simple rodlike monoester compounds by addition of their achiral homologues

Keiki Kishikawa,\* Hiroyuki Itoh, Seiji Akiyama, Takahiro Kobayashi, and Shigeo Kohmoto

Department of Applied Chemistry and Biotechnology, Faculty of Engineering, Chiba University, 1-33  
Yayoi-cho, Inage-ku, Chiba 263-8522, Japan

### Experimental

**A typical procedure for synthesis of esters (synthesis of 1).** 4-(4-(*R*)-1-Methylheptyloxyphenyl)benzoic acid (**8**) and 4-(4-(*R*)-1-methylheptyloxyphenyl)phenol (**9**) were obtained by Mitsunobu reaction of (*S*)-1-methylheptanol with 4-(4-hydroxyphenyl)-benzoic acid and 4,4'-biphenol, respectively. Reaction of **8** with thionyl chloride gave 4-(4-(*R*)-1-methylheptyloxyphenyl)benzoyl chloride (**10**).

Into a three-necked 100mL-round bottom flask were added **10** (145 mg, 0.420 mmol), **9** (133 mg, 0.446 mmol), 4-(dimethylamino)pyridine (5 mg, 0.04 mmol), dichloromethane (30 mL), and triethylamine (0.12 mL, 0.90 mmol). The solution was stirred for 24 h at room temperature. Distilled water (50 mL) was added and the solution was extracted with chloroform (100mL × 4). The solution was dried over anhydrous magnesium sulfate, filtrated with suction, and concentrated by a rotary evaporator. The crude mixture was separated by column chromatography on silica gel eluting with chloroform-hexane (1:5) to give a white solid (**1**).

**4-(4-(*R*)-1-Methylheptyloxyphenyl)phenyl 4-(4-(*R*)-1-methyl-heptyloxyphenyl)benzoate (1).** Yield: 41%;  $\nu_{\max}(\text{KBr})/\text{cm}^{-1}$  2929, 2856, 1733, 1496, 1466, 1376, 1079, 830, 723;  $\delta_{\text{H}}(400 \text{ MHz}; \text{CDCl}_3; \text{Me}_4\text{Si})$  0.82 (t,  $J = 6.7 \text{ Hz}$ , 6H), 1.18-1.44 (m, 20H), 1.48-1.56 (m, 4H), 1.66-1.70 (m, 2H), 4.33 (sex,  $J = 6.0$ , 1H), 4.38 (sex,  $J = 6.0 \text{ Hz}$ , 1H), 6.89 (d,  $J = 8.7 \text{ Hz}$ , 2H), 6.92 (d,  $J = 8.6 \text{ Hz}$ , 2H), 7.20 (d,  $J = 8.7 \text{ Hz}$ , 2H), 7.44 (d,  $J = 8.7 \text{ Hz}$ , 2H), 7.52 (d,  $J = 8.6 \text{ Hz}$ , 4H), 7.62 (d,  $J = 8.5 \text{ Hz}$ , 2H), 8.20 (d,  $J = 8.6 \text{ Hz}$ , 2H);  $\delta_{\text{C}}(99.45 \text{ MHz}; \text{CDCl}_3; \text{Me}_4\text{Si})$  14.1, 19.8, 22.6, 25.6, 29.3, 31.8, 36.5, 74.0, 108.2, 116.1, 116.2, 121.6, 126.6, 127.5, 127.7, 128.2, 128.4, 130.7, 131.8, 132.7, 138.7, 146.0, 149.9, 157.9, 158.7; HRMS (FAB) 606.3698 ( $\text{M}^+$ .  $\text{C}_{41}\text{H}_{50}\text{O}_4$  requires 606.3709);  $[\alpha]_{\text{D}}^{27} -2.61$  (c 0.114 in  $\text{CHCl}_3$ ).

**4-(4-(*R*)-1-Methylheptyloxyphenyl)phenyl 4-(4-octyloxy-phenyl)benzoate (2).** Yield 30%;  $\nu_{\max}(\text{KBr})/\text{cm}^{-1}$  2923, 2853, 1729, 1496, 1474, 1376, 1074, 826, 720;  $\delta_{\text{H}}(400 \text{ MHz}; \text{CDCl}_3; \text{Me}_4\text{Si})$  0.88 (t,  $J = 6.7 \text{ Hz}$ , 3H), 0.91 (t,  $J = 6.7 \text{ Hz}$ , 3H), 1.30-1.48 (m, 18H), 1.55-1.62 (m, 4H), 1.73-1.86 (m, 3H), 4.02 (t,  $J = 6.5 \text{ Hz}$ , 2H), 4.40 (sex,  $J = 6.0 \text{ Hz}$ , 1H), 6.96 (d,  $J = 8.7 \text{ Hz}$ , 2H), 7.01 (d,  $J = 8.6 \text{ Hz}$ , 2H), 7.27 (d,  $J = 8.7 \text{ Hz}$ , 2H), 7.51 (d,  $J = 8.5 \text{ Hz}$ , 2H), 7.60 (d,  $J = 8.6 \text{ Hz}$ , 2H), 7.61 (d,  $J = 8.6 \text{ Hz}$ , 2H), 7.70 (d,  $J = 8.5 \text{ Hz}$ , 2H), 8.25 (d,  $J = 8.6 \text{ Hz}$ , 2H);  $\delta_{\text{C}}(99.45 \text{ MHz}; \text{CDCl}_3; \text{Me}_4\text{Si})$  14.1, 19.8, 22.6, 25.6, 29.2, 29.3, 29.4, 31.8, 68.2, 115.0, 116.1, 121.9, 126.6, 127.5, 127.7, 128.1, 128.3, 130.7, 132.0, 132.6, 138.7, 157.9; HRMS (FAB) 606.3659 ( $\text{M}^+$ .  $\text{C}_{41}\text{H}_{50}\text{O}_4$  requires 606.3709);  $[\alpha]_{\text{D}}^{27} -1.34$  (c 0.149 in  $\text{CHCl}_3$ ).

**4-(4-Octyloxyphenyl)phenyl 4-(4-octyloxyphenyl)benzoate (3).** Yield 38%;  $\nu_{\max}(\text{KBr})/\text{cm}^{-1}$  2921, 1733, 1498, 1474, 1396, 1085, 834, 721;  $\delta_{\text{H}}(400 \text{ MHz}; \text{CDCl}_3; \text{Me}_4\text{Si})$  0.85 (t,  $J = 7.1 \text{ Hz}$ , 6H), 1.30-1.48 (m, 18H), 1.53-1.59 (m, 4H), 1.79-1.84 (m, 2H), 4.00 (t,  $J = 6.6 \text{ Hz}$ , 2H), 4.02 (t,  $J = 6.6 \text{ Hz}$ , 2H), 6.98 (d,  $J = 8.7 \text{ Hz}$ , 2H), 7.00 (d,  $J = 8.7 \text{ Hz}$ , 2H), 7.27 (d,  $J = 8.7 \text{ Hz}$ , 2H), 7.52 (d,  $J = 8.7 \text{ Hz}$ , 2H), 7.60 (d,  $J = 8.2 \text{ Hz}$ , 4H), 7.70 (d,  $J = 8.2 \text{ Hz}$ , 2H), 8.25 (d,  $J = 8.2 \text{ Hz}$ , 2H);  $\delta_{\text{C}}(99.45 \text{ MHz}; \text{CDCl}_3; \text{Me}_4\text{Si})$  14.1, 22.7, 26.0, 28.5, 29.3, 29.4, 31.8, 68.1, 105.2, 114.8, 115.0, 116.5, 121.9, 126.6, 127.7, 128.1, 128.4, 130.7, 132.0, 132.7, 149.9, 156.0, 158.8; HRMS (FAB) 606.3676 ( $\text{M}^+$ .  $\text{C}_{41}\text{H}_{50}\text{O}_4$  requires 606.3709).

**4-(4-(*R*)-1-Methylheptyloxyphenyl)phenyl 4-phenylbenzoate (4).** Yield 55%;  $\nu_{\max}(\text{KBr})/\text{cm}^{-1}$  2928, 2856, 1742, 1604, 1496, 1288, 1272, 1227, 1082, 806, 741, 696;  $\delta_{\text{H}}(400 \text{ MHz}; \text{CDCl}_3; \text{Me}_4\text{Si})$  0.89 (t,  $J = 6.7 \text{ Hz}$ , 3H), 1.29-1.47 (m, 10H), 1.56-1.61 (m, 2H), 1.74-1.77 (m, 1H), 4.39 (sex,  $J = 6.0 \text{ Hz}$ , 1H), 6.96 (dd,  $J = 8.9, 1.2 \text{ Hz}$ , 2H), 7.27 (dd,  $J = 8.9, 1.2 \text{ Hz}$ , 2H), 7.39-7.51 (m, 5H), 7.59 (d,  $J = 8.5 \text{ Hz}$ , 2H), 7.66 (d,  $J = 8.3 \text{ Hz}$ , 2H), 7.73 (d,  $J = 8.5 \text{ Hz}$ , 2H), 8.28 (d,  $J = 8.3 \text{ Hz}$ , 2H);  $\delta_{\text{C}}(99.45 \text{ MHz}; \text{CDCl}_3; \text{Me}_4\text{Si})$  14.1, 19.8, 22.6, 25.5, 29.3, 31.8, 36.5, 74.0, 116.1, 121.9, 127.2, 127.3, 127.7, 128.1, 128.2, 128.3, 129.0, 130.7, 132.6, 138.7, 139.8, 146.3, 149.8, 157.9, 165.2; HRMS (FAB) 478.2489 ( $\text{M}^+$ .  $\text{C}_{33}\text{H}_{34}\text{O}_3$  requires 478.2508);  $[\alpha]_{\text{D}}^{28.5} -2.25$  (c 0.300 in  $\text{CHCl}_3$ ).

**Synthesis of 7.** 4-(4-Octyloxyphenyl)benzyl chloride (**11**) was obtained by reaction of thionyl chloride and 4-(4-octyloxy-phenyl)benzyl alcohol which was prepared by alkylation of ethyl 4-(4-hydroxyphenyl)benzoate followed by reduction with LiAlH<sub>4</sub>.

Into a three-necked 100mL-round bottom flask were added **9** (100 mg, 0.335 mmol), THF (30 mL), and sodium hydride (60% dispersion in paraffin liquid, 24 mg, 1.0 mmol), and the solution was stirred for 30 min. A solution of **11** (111 mg, 0.335 mmol) in THF (5mL) and tetrabutylammonium iodide (37 mg, 0.10 mmol) were added to the solution. The solution was stirred for 24 h at room temperature. Distilled water (50 mL) was added and the solution was extracted with chloroform (100mL × 4). The solution was dried over anhydrous magnesium sulfate, filtrated with suction, and concentrated by a rotary evaporator. The crude mixture was separated by column chromatography on silica gel eluting with chloroform-hexane (1:1) to give a white solid (**7**).

**4-(4-(R)-1-Methylheptyloxyphenyl)phenyl 4-(4-octyloxy-phenyl)methyl ether (7).** Yield 56%;  $\nu_{\max}(\text{KBr})/\text{cm}^{-1}$  2921, 2852, 1500, 1465, 1379, 1049, 808, 722;  $\delta_{\text{H}}(400 \text{ MHz}; \text{CDCl}_3; \text{Me}_4\text{Si})$  0.87 (t,  $J = 6.7 \text{ Hz}$ , 3H), 0.90 (t,  $J = 6.7 \text{ Hz}$ , 3H), 1.29-1.47 (m, 17H), 1.53-1.59 (m, 6H), 1.71-1.84 (m, 2H), 4.00 (t,  $J = 6.6 \text{ Hz}$ , 2H), 4.37 (sex,  $J = 6.0 \text{ Hz}$ , 1H), 5.12 (s, 2H), 6.94 (d,  $J = 8.8 \text{ Hz}$ , 2H), 6.98 (d,  $J = 8.7 \text{ Hz}$ , 2H), 7.05 (d,  $J = 8.8 \text{ Hz}$ , 2H), 7.44-7.53 (m, 8H), 7.58 (d,  $J = 8.7 \text{ Hz}$ , 2H);  $\delta_{\text{C}}(99.45 \text{ MHz}; \text{CDCl}_3; \text{Me}_4\text{Si})$  14.1, 19.8, 22.7, 25.6, 26.1, 29.3, 29.4, 31.8, 36.5, 68.1, 73.3, 74.0, 114.8, 115.1, 116.1, 126.9, 127.7, 128.0, 128.1, 133.0, 133.8, 135.3, 157.4, 157.9; HRMS (FAB) 592.3911 ( $\text{M}^+$ . C<sub>41</sub>H<sub>52</sub>O<sub>3</sub> requires 592.3916);  $[\alpha]_{\text{D}}^{27} +1.08$  (c 0.369 in CHCl<sub>3</sub>).

### Polarized optical microphotographs

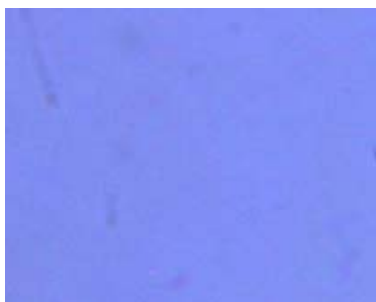

**Figure 1S.** Microphotograph of the blue phase of **1** on heating (600×, 151.0°C).

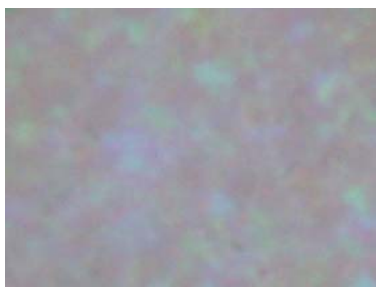

**Figure 2S.** Microphotograph of the blue phase of **2** on heating (600×, 240.8°C).

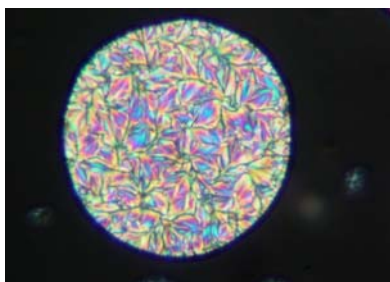

**Figure 3S.** Microphotograph of the chiral nematic phase of **2** on heating (600×, 239.0°C).

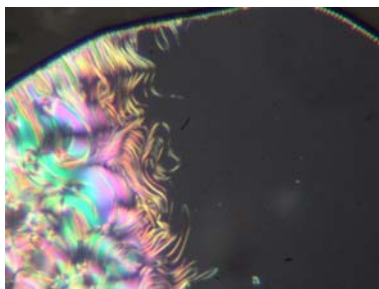

**Figure 4S.** Microphotograph of the transition from the SmA phase to the TGBA phase of **2** on heating (600 $\times$ , 232.5 $^{\circ}$ C).

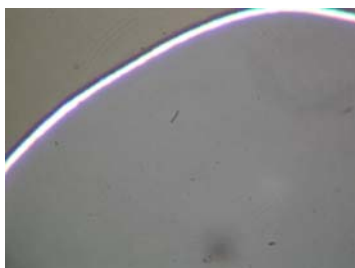

**Figure 5S.** Microphotograph of the SmA phase of **2** on heating (600 $\times$ , 225 $^{\circ}$ C).

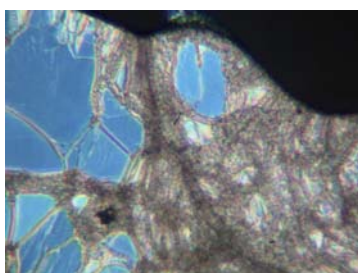

**Figure 6S.** Microphotograph of the SmC\* phase of **2** on heating (600 $\times$ , 180.0 $^{\circ}$ C).

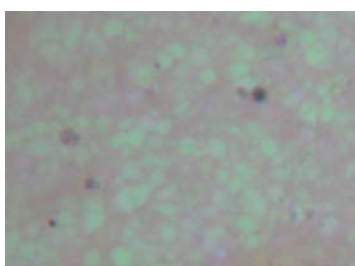

**Figure 7S.** Microphotograph of the blue phase of the mixture of **1** and **3** at the ratio of 1:1 on heating (600 $\times$ , 229.0 $^{\circ}$ C).

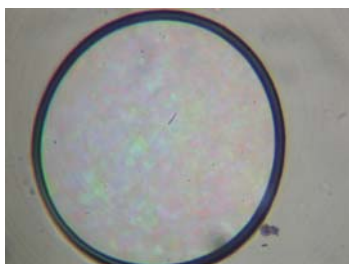

**Figure 8S.** Microphotograph of the blue phase of the mixture of **1** and **6** at the ratio of 1:1 on heating (600×, 125.0°C).

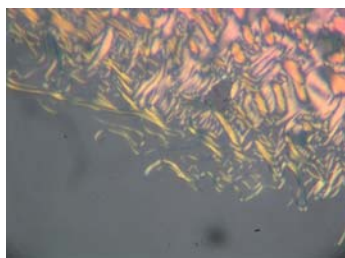

**Figure 9S.** Microphotograph of the TGBA phase of the mixture of **1** and **4** at the ratio of 1:1 on cooling (600×, 147.5°C).

**Table S1.** Phase transition temperatures of the mixtures of **1** and **3**.<sup>a</sup>

| Mole fraction | <i>Cr</i> | <i>SmC</i> | <i>N</i> | <i>BP</i> | <i>Iso</i> |
|---------------|-----------|------------|----------|-----------|------------|
| 0.0           | ● 96.3    | ● 141.5    | ● 165.0  | ● 166.6   | ●          |
| 0.1           | ● 99.0    | ● 147.1    | ● 177.3  | ● 179.4   | ●          |
| 0.2           | ● 101.0   | ● 157.8    | ● 192.6  | ● 195.0   | ●          |
| 0.3           | ● 101.6   | ● 163.5    | ● 204.4  | ● 207.7   | ●          |
| 0.4           | ● 102.3   | ● 190.9    | ● 240.3  | ● 245.3   | ●          |
| 0.5           | ● 103.4   | ● 186.5    | ● 250.6  | ● 254.9   | ●          |
| 0.6           | ● 106.0   | ● 176.1    | ● 253.4  | ● 256.4   | ●          |
| 0.7           | ● 109.5   | ● 178.0    | ● 256.0  | ● 258.0   | ●          |
| 0.8           | ● 138.4   | ● 209.5    | ●        | - 252.8   | ●          |
| 0.9           | ● 153.3   | ● 258.1    | ●        | - 282.8   | ●          |
| 1.0           | ● 159.4   | ● 269.4    | ●        | - 269.4   | ●          |

<sup>a</sup> The temperature ranges were measured by POM. The heating and cooling rates are 0.1°C/min.

**Table S2.** Phase transition temperatures of the mixtures of **1** and **6**.<sup>a</sup>

| Mole fraction | <i>Cr</i> | <i>SmC</i> | <i>N</i> | <i>BP</i> | <i>Iso</i> |
|---------------|-----------|------------|----------|-----------|------------|
| 0.0           | ● 96.3    | ● 141.5    | ● 166.1  | ● 167.7   | ●          |
| 0.1           | ● 88.5    | ● 131.0    | ● 156.5  | ● 157.7   | ●          |
| 0.2           | ● 71.1    | ● 125.1    | ● 151.0  | ● 152.1   | ●          |
| 0.3           | ● 52.3    | ● 121.9    | ● 148.4  | ● 149.5   | ●          |
| 0.4           | ● 42.8    | ● 120.3    | ● 146.2  | ● 147.3   | ●          |
| 0.5           | ● 37.0    | ● 97.6     | ● 132.6  | ● 133.6   | ●          |
| 0.6           | ● 24.4    | ● 93.6     | ● 118.7  | ● 119.6   | ●          |
| 0.7           | ● 36.7    | ● 86.5     | ●        | - 109.0   | ●          |
| 0.8           | ● 29.5    | ● 85.8     | ●        | - 109.3   | ●          |
| 0.9           | ● 28.8    | ● 79.8     | ●        | - 100.1   | ●          |
| 1.0           | ● 63.3    | ● 76.4     | ●        | - 94.4    | ●          |

<sup>a</sup> The temperature ranges were measured by POM. The heating and cooling rates are 0.1°C/min.

**Selective refractions of the pure **1** (10:0) and the mixtures of **1** and **3** (9:1, 8:2, 7:3, 6:4, and 5:5).**  
 The selective refractions of the pure chiral compound **1** and the mixtures of **1** and achiral compound **3** were carried out by POM at  $T_{bp-N}-T = 5$  (K) ( $T_{bp-N}$ : transition temperature of the BP and N) without the polarizers.

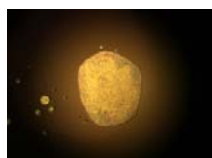

(a) 10:0 (no color)

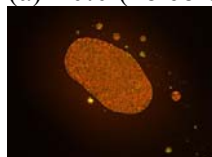

(b) 9:1 (orange-red)

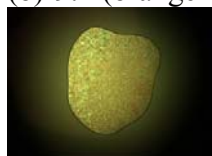

(c) 8:2 (green-yellow)

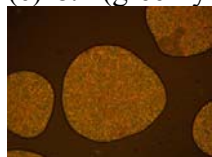

(d) 7:3 (orange)

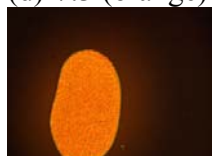

(e) 6:4 (orange-red)

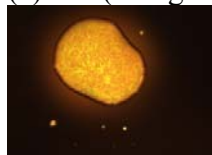

(f) 5:5 (red-no color)

**Figure 10S.** Selective reflections of the mixtures **1:3** against the molar ratios. Pure chiral compound **1** did not have color (a). The mixtures at 9:1 and 8:2 showed orange-red (b) and green-yellow (c), which indicated that the helical pitch became shorter by addition of achiral compound **3**. However, the mixtures at 7:3 and 6:4 showed orange (d) and orange-red (e), and at 5:5 it exhibited pale red, which meant that the helical pitch became longer by addition of the achiral dopant.
